# Supplementary material for: Epstein-Barr virus nuclear antigen EBNA-LP is essential for transforming naïve B cells, and facilitates recruitment of transcription factors to the viral genome
Source: PLoS Pathog. 2018 Feb 20;14(2):e1006890. doi: 10.1371/journal.ppat.1006890 (PMC5834210; doi:10.1371/journal.ppat.1006890)
Supplement: S2 Data — The first tab (Expt set up) describes the virus stocks used, their titre, the cell numbers per well used for each B cell subset, and the amount of virus used, based on an MOI of 0.6, shown at the bottom of the table. Numbers 1–6 (code number column) are the labels found in the raw data identifiers. Cell numbers per sample (row 15) represents 1/7 of the total yield of cells from the magnetic sorting of B cells from 7 ml of cord blood. The raw data from the NC3000 is in the final tab of the workbook. Each count measured the total live cells (gated by acridine orange area to remove debris), and also separated the cells into two sizes—the size that matched all of the uninfected (ie smaller) cells—gate M2—and a gate for the larger cells, that appeared only after EBV infection. The second tab contains two sets of data and plots: the left part of the tab is the total DAPI-ve cells (gate M2+M3: live small + live large); to the right is plotted only the larger live (DAPI-ve) cells (gate M3; live large cells only). Each set of data is plotted on linear and log scale graphs to help visualise different aspects of the data. (XLSX) [file ppat.1006890.s019.xlsx]

## Sheet: Expt Set-up
Supplementary data file SD2: Cell count data for LCL outgrowth from cord blood B cell sample C282. This tab (Expt set up) describes the virus stocks used, their titre, the cell numbers per well used for each B cell subset, and the amount of virus used, based on an MOI of 0.6, shown at the bottom of the table. Numbers 1-6 (code number column) are the labels found in the raw data identifiers. Cell …
# cells:	381000
			C282
Virus	Titre (rgu/µl)	Code number	Volume added
uninfected		U	0
WTw.1-A11	1190	1	187	WTw.1-A11
LPKOw.2-C3	2140	2	104	LPKOw.2-C3
YKO.3-A3	276	3	806	YKO.3-A3
Yrev.4-A4	1150	4	193	Yrev.4-A4
LPrevi.2-A5	672	5	331	LPrevi.2-A5
WTHB9-A4	1420	6	157	WTHB9-A4
		MOI:	0.6
		cells/sample:	381000
			Set up in wells - no centrifugation
			Cells allowed to rest overnight prior to infection

## Sheet: Outgrowth Graphs
	Total cell count																		Large cells only
		0	3	7	11	15	18	21	25	28	32	35	39	42	49				3	7	11	15	18	21	25	28	32	35	39	42	49
C282 B cells	uninfected	381000	96089.4	97482	82627.6	47812.6											uninfected	U	5570.4	11605	0	464.2
	WTw.1-A11	381000	146687	393177	1269587	1.66323e+06											WTw.1-A11	WTw.1-A11	33886.6	287340	828133	1.16143e+06
	LPKOw.2-C3	381000	139724	142509	149008	115122	101660	88662.2	88662.2	66844.8	58489.2	54311.4	51990.4	36207.6	25066.8		LPKOw.2-C3	LPKOw.2-C3	26459.4	25995.2	28316.2	15782.8	11605	10212.4	12533.4	5106.2	5570.4	9284	4177.8	2321	2321
	YKO.3-A3	381000	191250	212604	252061	243241	174075	137867	127655	88198	87733.8	86805.4	111872	152722	1.09644e+06		YKO.3-A3	YKO.3-A3	48741	94696.8	146223	138796	61274.4	41313.8	26459.4	13461.8	15318.6	23674.2	43634.8	91447.4	988282
	Yrev.4-A4	381000	225601	290125	839274	1.47105e+06											Yrev.4-A4	Yrev.4-A4	32494	170361	671697	1.04491e+06
	LPrevi.2-A5	381000	173611	188001	254382	350007	467914	457701	654522	878731							LPrevi.2-A5	LPrevi.2-A5	24138.4	54311.4	121620	230707	321226	326797	487410	701870
	WTHB9-A4	381000	149472	283626	747362	1.32715e+06											WTHB9-A4	WTHB9-A4	23210	157364	600675	1.06441e+06

## Sheet: Day 3
Cells per ml adjustment factor:	464.2
														SubG1 total		Small cell total		Lge cell total		SubG1 dead		SubG1 live		Small cell dead		Small cell live		Large Cell dead		Lge cell live
Filename		virus	Cell type	MOI	Day	Donor	Live cells/ml	Dead cells/ml		Live small	Live large	dead small	dead large	Count	% of plot	Count	% of plot	Count	% of plot	Count	% of plot	Count	% of plot	Count	% of plot	Count	% of plot	Count	% of plot	Count	% of plot
20171112-0001-1-C282 U day 3	C282 U day 3	uninfected	B cells	1	3	C282	96089.4	89126.4		90519	5570.4	88662.2	464.2	56	12.31	386	84.84	13	2.86	42	75	14	25	191	49.48	195	50.52	1	7.69	12	92.31
20171112-0001-2-C282-1 day 3	C282-1 day 3	WTw.1-A11	B cells	1	3	C282	146687	84948.6		112801	33886.6	81699.2	3249.4	75	13.07	419	73	80	13.94	39	52	36	48	176	42	243	58	7	8.75	73	91.25
20171112-0001-3-C282-2 day 3	C282-2 day 3	LPKOw.2-C3	B cells	1	3	C282	139724	80770.8		113265	26459.4	79842.4	928.4	83	14.87	416	74.55	59	10.57	50	60.24	33	39.76	172	41.35	244	58.65	2	3.39	57	96.61
20171112-0001-4-C282-3 day 3	C282-3 day 3	YKO.3-A3	B cells	1	3	C282	191250	64988		142509	48741	64059.6	928.4	168	23.33	445	61.81	107	14.86	44	26.19	124	73.81	138	31.01	307	68.99	2	1.87	105	98.13
20171112-0001-5-C282-4 day 3	C282-4 day 3	Yrev.4-A4	B cells	1	3	C282	225601	102124		193107	32494	97946.2	4177.8	163	18.74	627	72.07	79	9.08	51	31.29	112	68.71	211	33.65	416	66.35	9	11.39	70	88.61
20171112-0001-6-C282-5 day 3	C282-5 day 3	LPrevi.2-A5	B cells	1	3	C282	173611	102124		149472	24138.4	99803	2321	160	21.22	537	71.22	57	7.56	54	33.75	106	66.25	215	40.04	322	59.96	5	8.77	52	91.23
20171112-0001-7-C282-6 day 3	C282-6 day 3	WTHB9-A4	B cells	1	3	C282	149472	92840		126262	23210	92375.8	464.2	135	20.55	471	71.69	51	7.76	73	54.07	62	45.93	199	42.25	272	57.75	1	1.96	50	98.04

## Sheet: Day 7
Cells per ml fudge factor:	464.2
														SubG1 total		Small cell total		Lge cell total		SubG1 dead		SubG1 live		Small cell dead		Small cell live		Large Cell dead		Lge cell live
Filename		virus	Cell type	MOI	Day	Donor	Live cells/ml	Dead cells/ml		Live small	Live large	dead small	dead large	Count	% of plot	Count	% of plot	Count	% of plot	Count	% of plot	Count	% of plot	Count	% of plot	Count	% of plot	Count	% of plot	Count	% of plot
20171116-0001-1-C282-U Day 7	C282-U Day 7	Uninfected	B cells	1	7	C282	97482	79378.2		85877	11605	67309	12069.2	78	16.99	330	71.9	51	11.11	43	55.13	35	44.87	145	43.94	185	56.06	26	50.98	25	49.02
20171116-0001-2-C282-1 Day 7	C282-1 Day 7	WTw.1-A11	B cells	1	7	C282	393177	74272		105838	287340	67773.2	6498.8	271	21.21	374	29.26	633	49.53	50	18.45	221	81.55	146	39.04	228	60.96	14	2.21	619	97.79
20171116-0001-3-C282-2 Day 7	C282-2 Day 7	LPKOw.2-C3	B cells	1	7	C282	142509	77057.2		116514	25995.2	66844.8	10212.4	180	27.57	395	60.49	78	11.94	84	46.67	96	53.33	144	36.46	251	63.54	22	28.21	56	71.79
20171116-0001-4-C282-3 Day 7	C282-3 Day 7	YKO.3-A3	B cells	1	7	C282	212604	91911.6		117907	94696.8	74736.2	17175.4	278	29.76	415	44.43	241	25.8	44	15.83	234	84.17	161	38.8	254	61.2	37	15.35	204	84.65
20171116-0001-5-C282-4 Day 7	C282-4 Day 7	Yrev.4-A4	B cells	1	7	C282	290125	88662.2		119764	170361	80306.6	8355.6	255	23.81	431	40.24	385	35.95	54	21.18	201	78.82	173	40.14	258	59.86	18	4.68	367	95.32
20171116-0001-6-C282-5 Day 7	C282-5 Day 7	LPrevi.2-A5	B cells	1	7	C282	188001	73807.8		133690	54311.4	65452.2	8355.6	246	30.37	429	52.96	135	16.67	60	24.39	186	75.61	141	32.87	288	67.13	18	13.33	117	86.67
20171116-0001-7-C282-6 Day 7	C282-6 Day 7	WTHB9-A4	B cells	1	7	C282	283626	87269.6		126262	157364	70094.2	17175.4	272	25.4	423	39.5	376	35.11	72	26.47	200	73.53	151	35.7	272	64.3	37	9.84	339	90.16

## Sheet: Day 11
Cells per ml fudge factor:	464.2
														SubG1 total		Small cell total		Lge cell total		SubG1 dead		SubG1 live		Small cell dead		Small cell live		Large Cell dead		Lge cell live
Filename		virus	Cell type	MOI	Day	Donor	Live cells/ml	Dead cells/ml		Live small	Live large	dead small	dead large	Count	% of plot	Count	% of plot	Count	% of plot	Count	% of plot	Count	% of plot	Count	% of plot	Count	% of plot	Count	% of plot	Count	% of plot
20171116-0001-1-C282-U Day 7	C282-U Day 7	Uninfected	B cells	1	11	C282	82627.6	32029.8		82627.6	0	31101.4	928.4	91	26.92	245	72.49	2	0.59	63	69.23	28	30.77	67	27.35	178	72.65	2	100	0	0
20171116-0001-2-C282-1 Day 7	C282-1 Day 7	WTw.1-A11	B cells	1	11	C282	1269587	128119		441454	828133	86341.2	41778	477	13.68	1137	32.6	1874	53.73	70	14.68	407	85.32	186	16.36	951	83.64	90	4.8	1784	95.2
20171116-0001-3-C282-2 Day 7	C282-2 Day 7	LPKOw.2-C3	B cells	1	11	C282	149008	80770.8		120692	28316.2	71022.6	9748.2	194	28.16	413	59.94	82	11.9	87	44.85	107	55.15	153	37.05	260	62.95	21	25.61	61	74.39
20171116-0001-4-C282-3 Day 7	C282-3 Day 7	YKO.3-A3	B cells	1	11	C282	252061	128119		105838	146223	102588	25531	339	29.25	449	38.74	370	31.92	76	22.42	263	77.58	221	49.22	228	50.78	55	14.86	315	85.14
20171116-0001-5-C282-4 Day 7	C282-4 Day 7	Yrev.4-A4	B cells	1	11	C282	839274	132761		167576	671697	107230	25531	548	20.74	592	22.41	1502	56.85	89	16.24	459	83.76	231	39.02	361	60.98	55	3.66	1447	96.34
20171116-0001-6-C282-5 Day 7	C282-5 Day 7	LPrevi.2-A5	B cells	1	11	C282	254382	94696.8		132761	121620	78449.8	16247	372	33.1	455	40.48	297	26.42	54	14.52	318	85.48	169	37.14	286	62.86	35	11.78	262	88.22
20171116-0001-7-C282-6 Day 7	C282-6 Day 7	WTHB9-A4	B cells	1	11	C282	747362	103052		146687	600675	70094.2	32958.2	524	22.24	467	19.82	1365	57.94	92	17.56	432	82.44	151	32.33	316	67.67	71	5.2	1294	94.8

## Sheet: Day 15
Cells per ml fudge factor:	464.2
														SubG1 total		Small cell total		Lge cell total		SubG1 dead		SubG1 live		Small cell dead		Small cell live		Large Cell dead		Lge cell live
Filename		virus	Cell type	MOI	Day	Donor	Live cells/ml	Dead cells/ml		Live small	Live large	dead small	dead large	Count	% of plot	Count	% of plot	Count	% of plot	Count	% of plot	Count	% of plot	Count	% of plot	Count	% of plot	Count	% of plot	Count	% of plot
20171124-0001-1-C282-U Day 15	C282-U Day 15	Uninfected	B cells	1	15	C282	47812.6	39921.2		47348.4	464.2	37136	2785.2	68	26.46	182	70.82	7	2.72	44	64.71	24	35.29	80	43.96	102	56.04	6	85.71	1	14.29
20171124-0001-2-C282-1 Day 15	C282-1 Day 15	WTw.1-A11	B cells	1	15	C282	1.66323e+06	391785		501800	1.16143e+06	268772	123013	1077	19.56	1660	30.15	2767	50.26	50	4.64	1027	95.36	579	34.88	1081	65.12	265	9.58	2502	90.42
20171124-0001-3-C282-2 Day 15	C282-2 Day 15	LPKOw.2-C3	B cells	1	15	C282	115122	90983.2		99338.8	15782.8	72879.4	18103.8	185	29.41	371	58.98	73	11.61	75	40.54	110	59.46	157	42.32	214	57.68	39	53.42	34	46.58
20171124-0001-4-C282-3 Day 15	C282-3 Day 15	YKO.3-A3	B cells	1	15	C282	243241	220959		104445	138796	155971	64988	448	30.94	561	38.74	439	30.32	86	19.2	362	80.8	336	59.89	225	40.11	140	31.89	299	68.11
20171124-0001-5-C282-4 Day 15	C282-4 Day 15	Yrev.4-A4	B cells	1	15	C282	1.47105e+06	304051		426136	1.04491e+06	226994	77057.2	1000	20.73	1407	29.17	2417	50.1	141	14.1	859	85.9	489	34.75	918	65.25	166	6.87	2251	93.13
20171124-0001-6-C282-5 Day 15	C282-5 Day 15	LPrevi.2-A5	B cells	1	15	C282	350007	149472		119299	230707	109551	39921.2	576	34.87	493	29.84	583	35.29	69	11.98	507	88.02	236	47.87	257	52.13	86	14.75	497	85.25
20171124-0001-7-C282-6 Day 15	C282-6 Day 15	WTHB9-A4	B cells	1	15	C282	1.32715e+06	275271		262737	1.06441e+06	197749	77521.4	941	21.42	992	22.58	2460	56	110	11.69	831	88.31	426	42.94	566	57.06	167	6.79	2293	93.21

## Sheet: Day 18
Cells per ml fudge factor:	464.2
														SubG1 total		Small cell total		Lge cell total		SubG1 dead		SubG1 live		Small cell dead		Small cell live		Large Cell dead		Lge cell live
Filename		virus	Cell type	MOI	Day	Donor	Live cells/ml	Dead cells/ml		Live small	Live large	dead small	dead large	Count	% of plot	Count	% of plot	Count	% of plot	Count	% of plot	Count	% of plot	Count	% of plot	Count	% of plot	Count	% of plot	Count	% of plot
					18
20171127-0001-1-C282-2 Day 18	C282-2 Day 18	LPKOw.2-C3	B cells	1	18	C282	101660	74272		90054.8	11605	59417.6	14854.4	161	29.81	322	59.63	57	10.56	23	14.29	138	85.71	128	39.75	194	60.25	32	56.14	25	43.86
20171127-0001-2-C282-3 Day 18	C282-3 Day 18	YKO.3-A3	B cells	1	18	C282	174075	180574		112801	61274.4	118835	61738.6	498	39.43	499	39.51	265	20.98	56	11.24	442	88.76	256	51.3	243	48.7	133	50.19	132	49.81
20171127-0001-3-C282-5 Day 18	C282-5 Day 18	LPrevi.2-A5	B cells	1	18	C282	467914	149937		146687	321226	105838	44099	640	32.47	544	27.6	787	39.93	40	6.25	600	93.75	228	41.91	316	58.09	95	12.07	692	87.93

## Sheet: Day 21
Cells per ml fudge factor:	464.2
														SubG1 total		Small cell total		Lge cell total		SubG1 dead		SubG1 live		Small cell dead		Small cell live		Large Cell dead		Lge cell live
Filename		virus	Cell type	MOI	Day	Donor	Live cells/ml	Dead cells/ml		Live small	Live large	dead small	dead large	Count	% of plot	Count	% of plot	Count	% of plot	Count	% of plot	Count	% of plot	Count	% of plot	Count	% of plot	Count	% of plot	Count	% of plot
					21
20171130-0001-1-C282-2 Day 21	C282-2 Day 21	LPKOw.2-C3	B cells	1	21	C282	88662.2	51990.4		78449.8	10212.4	40385.4	11605	136	30.98	256	58.31	47	10.71	25	18.38	111	81.62	87	33.98	169	66.02	25	53.19	22	46.81
20171130-0001-2-C282-3 Day 21	C282-3 Day 21	YKO.3-A3	B cells	1	21	C282	137867	123013		96553.6	41313.8	84020.2	38992.8	464	45.14	389	37.84	173	16.83	62	13.36	402	86.64	181	46.53	208	53.47	84	48.55	89	51.45
20171130-0001-3-C282-5 Day 21	C282-5 Day 21	LPrevi.2-A5	B cells	1	21	C282	457701	134618		130904	326797	89126.4	45491.6	625	32.88	474	24.93	802	42.19	37	5.92	588	94.08	192	40.51	282	59.49	98	12.22	704	87.78

## Sheet: Day 25
Cells per ml fudge factor:	464.2
														SubG1 total		Small cell total		Lge cell total		SubG1 dead		SubG1 live		Small cell dead		Small cell live		Large Cell dead		Lge cell live
Filename		virus	Cell type	MOI	Day	Donor	Live cells/ml	Dead cells/ml		Live small	Live large	dead small	dead large	Count	% of plot	Count	% of plot	Count	% of plot	Count	% of plot	Count	% of plot	Count	% of plot	Count	% of plot	Count	% of plot	Count	% of plot
					25
20171204-0001-1-C282-2 Day 25	C282-2 Day 25	LPKOw.2-C3	B cells	1	25	C282	88662.2	40385.4		76128.8	12533.4	31565.6	8819.8	163	36.96	232	52.61	46	10.43	6	3.68	155	95.09	68	29.31	164	70.69	19	41.3	27	58.7
20171204-0001-2-C282-2 Day 25	C282-2 Day 25	YKO.3-A3	B cells	1	25	C282	127655	77057.2		101196	26459.4	55239.8	21817.4	526	54.4	337	34.85	104	10.75	31	5.89	495	94.11	119	35.31	218	64.69	47	45.19	57	54.81
20171204-0001-3-C282-2 Day 25	C282-2 Day 25	LPrevi.2-A5	B cells	1	25	C282	654522	132297		167112	487410	87733.8	44563.2	920	35.18	549	20.99	1146	43.82	36	3.91	884	96.09	189	34.43	360	65.57	96	8.38	1050	91.62

## Sheet: Day 28
Cells per ml fudge factor:	464.2
														SubG1 total		Small cell total		Lge cell total		SubG1 dead		SubG1 live		Small cell dead		Small cell live		Large Cell dead		Lge cell live
Filename		virus	Cell type	MOI	Day	Donor	Live cells/ml	Dead cells/ml		Live small	Live large	dead small	dead large	Count	% of plot	Count	% of plot	Count	% of plot	Count	% of plot	Count	% of plot	Count	% of plot	Count	% of plot	Count	% of plot	Count	% of plot
					28
20171207-0001-1-C282-2 Day 28	C282-2 Day 28	LPKOw.2-C3	B cells	1	28	C282	66844.8	34350.8		61738.6	5106.2	23674.2	10676.6	96	30.57	184	58.6	34	10.83	4	4.17	92	95.83	51	27.72	133	72.28	23	67.65	11	32.35
20171207-0001-2-C282-3 Day 28	C282-3 Day 28	YKO.3-A3	B cells	1	28	C282	88198	39457		74736.2	13461.8	32494	6963	477	63.43	231	30.72	44	5.85	13	2.73	463	97.06	70	30.3	161	69.7	15	34.09	29	65.91
20171207-0001-3-C282-5 Day 28	C282-5 Day 28	LPrevi.2-A5	B cells	1	28	C282	878731	118371		176860	701870	78449.8	39921.2	1340	38.42	550	15.77	1598	45.81	50	3.73	1290	96.27	169	30.73	381	69.27	86	5.38	1512	94.62

[truncated: 6 more sheets: Day 32, Day 35, Day 39, Day 42, Day 49, Raw data (all)]
